# Supplementary material for: Facile synthesis of multiarmed and multicomponent star polymers by a new iterative methodology using (formyl-protected 1,3-dioxolane)-end-functionalized polymer anions
Source: Royal Society of Chemistry journal article supplement (doi:10.1039/c6py01341d), 2016-01-01
Supplement: c6py01341d1.pdf [file c6py01341d1.pdf]

## Supporting Information

# **Facile Synthesis of Multiarmed and Multicomponent Star Polymers by New Iterative Methodology Using (Formyl-Protected 1,3-Dioxolane)-End-Functionalized Polymer Anions**

**Raita Goseki<sup>\*†</sup>, Shotaro Ito<sup>†</sup>, Emi Akemine<sup>†</sup>, and Akira Hirao<sup>†,‡,§</sup>**

<sup>†</sup>Department of Organic and Polymeric Materials, Graduate School of Science and Engineering, Tokyo Institute of Technology, 2-12-1-S1-6, O-okayama, Meguro-ku, Tokyo 152-8550, Japan

<sup>‡</sup>Department of Chemical Engineering, National Taiwan University, No. 1, Sec. 4, Roosevelt Road, Taipei 10617, Taiwan

<sup>§</sup>Department of Applied Chemistry, National Chiao Tung University, 1001 University Road, Hsinchu 30010, Taiwan

Corresponding author: R. Goseki, E-mail: rgoseki@polymer.titech.ac.jp

## Experimental details

**General Synthetic Procedure for  $\mu$ -Star Polymers.** Except for deprotection and esterification reactions, all of the polymerizations and linking reactions were carried out under high vacuum conditions ( $10^{-6}$  torr) in sealed handmade glass reactors equipped with breakseals. The operations were performed according to the usual high vacuum technique with breakseals previously reported.<sup>1</sup>

The typical synthetic procedures are described in the following sections. An excess amount (1.5- – 3-fold excess) of the living anionic polymer for the formyl or PA reaction site was usually used. In general, yields of the objective polymers were quantitative. The synthesized  $\mu$ -star polymers were isolated by fractional precipitation (yield: ca. 40 ~ 70%) or SEC fractionation (yield: ca. 60 ~ 80%). These polymers were purified by reprecipitation twice and freeze-dried for overnight, and measured by <sup>1</sup>H NMR, SEC, and RALLS.

**Synthesis of 1,1-Bis(3-(1,3-dioxolan-2-yl)phenyl)ethylene (4).** 1,1-di(3-formylphenyl)ethanol (22.4 g, 88.1 mmol)<sup>2</sup>, ethylene glycol (12.2 g, 187 mmol), and a catalytic amount of *p*-toluene sulfonic acid were dissolved in toluene (100 mL) in 300 mL two-necked flask equipped with Dean-Stark head and the mixture was refluxed for 4.5 h. During refluxing, water was removed several times to shift the equilibrium. The reaction was then quenched with aqueous NaHCO<sub>3</sub> and the organic layer was washed with water and dried over MgSO<sub>4</sub>. A small amount of K<sub>2</sub>CO<sub>3</sub> was added to the organic layer to keep alkaline conditions. After filtration and evaporation, the residual oil was

purified by column chromatography on silica using dichloromethane/hexane (1/1, vol/vol) as an eluent to yield **4** in 58% yield (16.5 g, 108 mmol). Finally, after the addition of a small amount of BuLi to **4** until a red color was appeared, the **4** was distilled on the high vacuum line ( $\sim 10^{-6}$  torr) into the ampoules equipped with break-seals.  $^1\text{H}$  NMR ( $\text{CDCl}_3$ ):  $\delta$  7.77–7.21 (m, 8H, Ar), 5.70 (s, 2H, Ar–CH–O–), 5.40 (s, 2H,  $\text{CH}_2=\text{C}$ -Ar), 3.89 (m, 4H, -O- $\text{CH}_2\text{CH}_2$ -O-),  $^{13}\text{C}$  NMR ( $\text{CDCl}_3$ ):  $\delta$  149.2, 141.7, 136.2, 128.7, 128.0, 125.7, 124.9, 114.7, 103.3, 64.9.

**Synthesis of In-Chain-(OH and DOL)-Functionalized PMMA-*b*-PS.** The chain-end-formyl-functionalized PMMA was prepared by the living anionic polymerization of MMA (17.3 mmol) with the initiator prepared from *sec*-BuLi (0.156 mmol) and **3** (0.188 mmol) in the presence LiCl (0.486 mmol). The deprotection the DOL was performed in the same manner as that reported in our previous paper<sup>3</sup>.  $M_n$  (SEC) = 13.6 kg mol<sup>-1</sup>.  $^1\text{H}$  NMR ( $\text{CDCl}_3$ ):  $\delta$  9.86 (s, -CHO), 7.32–6.73 (br, aromatic), 3.81–3.53 (m, -COO- $\text{CH}_3$ ), 2.23–1.74 (br, - $\text{CH}_2$ -C( $\text{CH}_3$ )-), 1.21-0.84 (m, - $\text{CH}_2$ -C( $\text{CH}_3$ )-).

The resulting chain-end-formyl-functionalized PMMA (13.6 kg mol<sup>-1</sup>, 0.0669 mmol) dissolved in dry THF (9.60 mL) was cooled to -78 °C and reacted with the living polystyrene end-capped with **3** (0.0842 mmol) in THF (12.2 mL) at -78 °C for 12 h. After quenching with degassed methanol, the reaction mixture was poured into methanol. Then, the objective in-chain-(OH and DOL)-functionalized PMMA-*b*-PS was isolated in 55% by fractional precipitation using diethyl ether/THF/hexane (200/60/100, vol/vol/vol). The isolated polymer was purified by reprecipitation from THF to methanol twice and freeze-dried from its absolute benzene solution (0.992 g, 0.0366

mmol for the hydroxyl function).  $^1\text{H}$  NMR ( $\text{CDCl}_3$ ):  $\delta$  7.31–6.45 (br, aromatic), 5.76 (d, -O-CH(Ar)-O-), 5.55 (s, -C-CH(Ar)-OH), 4.09 and 4.02 (d, -O-CH<sub>2</sub>-CH<sub>2</sub>-O-), 3.81-3.50 (m, -COO-CH<sub>3</sub>), 2.61-0.77 (br, backbone).  $M_n$  (SEC) = 26.8 kg/mol.

**Synthesis of Core-DOL-Functionalized 3-Arm ABC  $\mu$ -Star Polymer.** Under an atmosphere of nitrogen, a dry  $\text{CH}_2\text{Cl}_2$  (5.0 mL) solution of  $\alpha$ -phenylacryloyl chloride (0.420 g, 2.52 mmol) was added dropwise to a mixture of the in-chain-(OH and DOL)-functionalized PMMA-*b*-PS (0.980 g, 0.0361 mmol,  $M_n$  (SEC-RALLS) = 26.8 kg mol<sup>-1</sup>) and DMAP (0.380 g, 3.12 mmol) in dry  $\text{CH}_2\text{Cl}_2$  (15.0 mL) at 0 °C. The reaction mixture was warmed to 40 °C (reflux temperature) and allowed to stir for 12 h. The polymer was precipitated in methanol, reprecipitation twice from the THF solution to methanol, and freeze-dried from its absolute benzene solution. An in-chain-(PA and DOL)-functionalized PMMA-*b*-PS was obtained (0.870 g, 0.0321 mmol).  $^1\text{H}$  NMR ( $\text{CDCl}_3$ ):  $\delta$  7.32–6.40 (br, aromatic), 6.15 (s, CH<sub>2</sub>=C(Ph)-COO-), 5.75 (d, -O-CH(Ar)-O-), 5.70 (s, CH<sub>2</sub>=C(Ph)-COO-), 4.07 and 3.99 (d, -O-CH<sub>2</sub>-CH<sub>2</sub>-O-), 3.82–3.50 (m, -COO-CH<sub>3</sub>), 2.61-0.77 (br, backbone).

The in-chain-(PA and DOL)-functionalized PMMA-*b*-PS (0.859 g, 0.0317 mmol) in THF (9.8 mL), precooled at -78 °C, was added to the living PBnMA (0.0102 mmol,  $M_n$  (SEC) = 10.7 kg mol<sup>-1</sup>) in THF (10.8 mL) at -78 °C. The reaction mixture was then allowed to stand at -40 °C for 12 h. The reaction was terminated with a few drops of degassed methanol and the polymer mixture was precipitated in methanol. The linked product was isolated in 64% by SEC fractionation. The isolated polymer was reprecipitated twice from THF solution to methanol and freeze-dried from its absolute

benzene solution. The target core-DOL-functionalized 3-arm ABC  $\mu$ -star polymer was obtained (0.770 g, 64%).  $^1\text{H}$  NMR ( $\text{CDCl}_3$ ):  $\delta$  7.32–6.40 (br, aromatic), 5.75 (d, -O-CH(Ar)-O-), 5.01–4.80 (m, -CH<sub>2</sub>-Ar), 4.03 (d, -OCH<sub>2</sub>-CH<sub>2</sub>-O-), 3.83–3.49 (m, -COO-CH<sub>3</sub>), 2.62–0.77 (br, backbone).  $M_n$  (RALLS) = 37.8 kg/mol.

**Synthesis of 5-Arm ABCDE  $\mu$ -Star Polymer.** The title 5-arm  $\mu$ -star polymer was synthesized from the core-DOL-functionalized 3-arm ABC  $\mu$ -star polymer by repeating the reaction sequence similar to the above-mentioned procedures. The reaction sequence involves deprotection of the DOL function to regenerate the formyl group ( $M_n$  = 37.8 kg mol<sup>-1</sup>, 0.680 g (0.0182 mmol)), followed by the linking reaction of the living P $\alpha$ MS end-capped with **3** ( $M_n$  = 10.9 kg mol<sup>-1</sup>, 0.0382 mmol). The usual work-up gave a 4-arm ABCD  $\mu$ -star polymer core-functionalized with hydroxyl and DOL groups (yield 46%).  $^1\text{H}$  NMR ( $\text{CDCl}_3$ ):  $\delta$  7.49–6.36 (br, aromatic), 5.74 (d, -O-CH(Ar)-O-), 5.53 (s, -C-CH(Ar)-OH), 5.02–4.81 (m, -CH<sub>2</sub>-Ar), 4.02 (d, -OCH<sub>2</sub>-CH<sub>2</sub>-O-), 3.83–3.48 (m, -COO-CH<sub>3</sub>), 2.62–0.77 (br, backbone), 0.66–0.03 (m,  $\alpha$ -CH<sub>3</sub>-C-Ar).  $M_n$  (RALLS) = 47.7 kg/mol.

The obtained 4-arm ABCD  $\mu$ -star polymer ( $M_n$  = 47.7 kg mol<sup>-1</sup>, 0.390 g, 0.00818 mmol) was esterified with  $\alpha$ -phenylacryloyl chloride (0.120 g (0.720 mmol)), and DMAP (0.100 g (0.820 mmol)) in  $\text{CH}_2\text{Cl}_2$  (20 mL) under the above-mentioned conditions. The same work-up gave a core-(PA and DOL)-functionalized 4-arm ABCD  $\mu$ -star polymer composed of PMMA, PS, PBnMA, and P $\alpha$ MS arms (0.260 g, 0.00545 mmol, 67%).  $^1\text{H}$  NMR ( $\text{CDCl}_3$ ):  $\delta$  7.48–6.37 (br, aromatic), 6.15 (s, CH<sub>2</sub>=C(Ph)-COO-), 5.74 (d, -O-CH(Ar)-O-), 5.69 (s, CH<sub>2</sub>=C(Ph)-COO-), 5.02–4.82 (m, -CH<sub>2</sub>-Ar), 4.04

(d,  $-\text{OCH}_2\text{CH}_2\text{O}-$ ), 3.82–3.48 (m,  $-\text{COO}-\text{CH}_3$ ), 2.63–0.76 (br, backbone) , 0.66–0.03 (m,  $\alpha\text{-CH}_3\text{-C-Ar}$ ).  $M_n(\text{RALLS}) = 47.6 \text{ kg mol}^{-1}$ .

The living P2VP was prepared by the polymerization of 2VP (0.314 g, 2.99 mmol) with 1,1-diphenylhexyllithium (0.0273 mmol) in THF (10.2 mL) at  $-78^\circ\text{C}$  for 0.5 h and in-situ reacted with the core-(PA and DOL)-functionalized ABCD  $\mu$ -star polymer ( $M_n = 47.6 \text{ kg mol}^{-1}$ , 0.00263 mmol) in THF (5.62 mL) at  $-78^\circ\text{C}$  for 12 h. The usual work-up gave a target 5-arm ABCDE  $\mu$ -star polymer, which was isolated in 53% yield by precipitation to methanol.  $^1\text{H}$  NMR ( $\text{CDCl}_3$ ):  $\delta$  8.45–8.04 (m,  $-\text{N}=\text{CH}-$ ), 7.49–6.22 (br, aromatic), 5.76 (d,  $-\text{O}-\text{CH}(\text{Ar})-\text{O}-$ ), 5.02–4.83 (m,  $-\text{CH}_2-\text{Ar}$ ), 4.05 (d,  $-\text{OCH}_2\text{CH}_2\text{O}-$ ), 3.83–3.48 (m,  $-\text{COO}-\text{CH}_3$ ), 2.65–0.76 (br, backbone) , 0.66–0.02 (m,  $\alpha\text{-CH}_3\text{-C-Ar}$ ).  $M_n(\text{RALLS}) = 56.2 \text{ kg mol}^{-1}$ .

The other 5-arm ABCDE'  $\mu$ -star polymer was similarly synthesized by the linking reaction of the living PCPPHM ( $M_n = 8.60 \text{ kg mol}^{-1}$ , 0.0670 g, 0.00783 mmol) with the above-synthesized core-(PA and DOL)-functionalized ABCD  $\mu$ -star polymer ( $M_n = 47.6 \text{ kg mol}^{-1}$ , 0.124 g, 0.00261 mmol).  $^1\text{H}$  NMR ( $\text{CDCl}_3$ ):  $\delta$  7.82–6.37 (br, aromatic), 5.75 (d,  $-\text{O}-\text{CH}(\text{Ar})-\text{O}-$ ), 5.03–4.84 (m,  $-\text{CH}_2-\text{Ar}$ ), 4.05–3.92 (m,  $-\text{OCH}_2\text{CH}_2\text{O}-$ ,  $-\text{COO}-\text{CH}_2\text{CH}_2-$ ), 3.83–3.48 (m,  $-\text{COO}-\text{CH}_3$ ), 2.65–0.76 (br, backbone) , 0.66–0.01 (m,  $\alpha\text{-CH}_3\text{-C-Ar}$ ).  $M_n(\text{RALLS}) = 57.2 \text{ kg/mol}$ .

**Synthesis of 5-Arm ABCDE  $\mu$ -Star Polymer Composed of PMOS, PMS, PS, P $\alpha$ MS, and PTBSOS.** The title 5-arm ABCDE  $\mu$ -star polymer was synthesized by repeating the same reaction sequence under the conditions similar to those already mentioned. The NMR spectra of all the polymers were as follows:  $^1\text{H}$  NMR, chain-end-

formyl-functionalized PMOS:  $\delta$  9.86 (s, -CHO), 7.24–6.10 (br, aromatic), 3.86 (m, -O-CH<sub>3</sub>), 2.21–0.64 (br, backbone and *sec*-Bu), in-chain-(OH and DOL)-functionalized PMOS-*b*-PMS: 7.22–6.12 (br, aromatic), 5.74 (d, -O-CH(Ar)-O-), 5.53 (s, -C-CH(Ar)-OH), 4.02 (d, -OCH<sub>2</sub>-CH<sub>2</sub>-O-), 3.86 (m, -O-CH<sub>3</sub>), 2.28 (m, -Ph-CH<sub>3</sub>) 2.62–0.77 (br, backbone), core-DOL-functionalized 3-arm ABC  $\mu$ -star polymer: 7.23–6.09 (br, aromatic), 5.75 (d, -O-CH(Ar)-O-), 4.03 (d, -OCH<sub>2</sub>-CH<sub>2</sub>-O-), 3.87 (m, -O-CH<sub>3</sub>), 2.29 (m, -Ph-CH<sub>3</sub>) 2.62–0.76 (br, backbone), core-(OH and DOL)-functionalized 4-arm ABCD  $\mu$ -star polymer: 7.24–6.08 (br, aromatic), 5.75 (d, -O-CH(Ar)-O-), 4.01 (d, -OCH<sub>2</sub>-CH<sub>2</sub>-O-), 3.86 (m, -O-CH<sub>3</sub>), 2.30 (m, -Ph-CH<sub>3</sub>) 2.62–0.76 (br, backbone), 0.67–0.09 (m,  $\square$ -CH<sub>3</sub>-C-Ar), core-DOL-functionalized 5-arm ABCDE  $\mu$ -star polymer: 7.26–6.02 (br, aromatic), 5.75 (d, -O-CH(Ar)-O-), 4.01 (d, -OCH<sub>2</sub>-CH<sub>2</sub>-O-), 3.88 (m, -O-CH<sub>3</sub>), 2.30 (m, -Ph-CH<sub>3</sub>) 2.62–0.76 (br, backbone), 0.90 (s, -Si-'Bu), 0.66–0.09 (m,  $\alpha$ -CH<sub>3</sub>-C-Ar), 0.01 (s, -Si-(CH<sub>3</sub>)<sub>3</sub>).

**Synthesis of 7-Arm ABCD<sub>2</sub>E<sub>2</sub>  $\mu$ -Star Polymers.** The 7-arm ABCD<sub>2</sub>E<sub>2</sub>  $\mu$ -star polymers were synthesized by repeating the same reaction sequence under the conditions similar to those already mentioned. The NMR spectra of all the polymers were as follows: <sup>1</sup>H NMR, chain-end-formyl-functionalized PS: 9.85 (s, -CHO), 7.24–6.09 (br, aromatic), 2.21–0.54 (br, backbone and *sec*-Bu), in-chain-(OH and DOL)-functionalized PS-*b*-PMS: 7.20–6.02 (br, aromatic), 5.77 (d, -O-CH(Ar)-O-), 4.02 (d, -OCH<sub>2</sub>-CH<sub>2</sub>-O-), 2.30 (m, -Ph-CH<sub>3</sub>) 2.22–0.43 (br, backbone and *sec*-Bu), core-(DOL)<sub>2</sub>-functionalized 3-arm ABC  $\mu$ -star polymer: 7.21–6.00 (br, aromatic), 5.74 (d, -O-CH(Ar)-O-), 4.02 (d, -OCH<sub>2</sub>-CH<sub>2</sub>-O-), 2.29 (m, -Ph-CH<sub>3</sub>), 2.24–0.77 (br, backbone),

0.66-0.09 (m,  $\alpha$ -CH<sub>3</sub>-C-Ar), core-((DOL)<sub>2</sub> and (OH)<sub>2</sub>)-functionalized 5-arm ABCD<sub>2</sub>  $\mu$ -star polymer: 7.22–6.01 (br, aromatic), 5.73 (d, -O-CH(Ar)-O-), 4.03 (d, -OCH<sub>2</sub>-CH<sub>2</sub>-O-), 3.85 (m, -O-CH<sub>3</sub>), 2.30 (m, -Ph-CH<sub>3</sub>), 2.25-0.76 (br, backbone), 0.65-0.07 (m,  $\alpha$ -CH<sub>3</sub>-C-Ar), core-(DOL)<sub>4</sub>-functionalized 7-arm ABCD<sub>2</sub>E<sub>2</sub>  $\mu$ -star polymer: 7.21–6.00 (br, aromatic), 5.74 (d, -O-CH(Ar)-O-), 5.14 (s, vinyl proton (1,4-PIsp)), 4.76 and 4.69 (s, vinyl proton (3,4-PIsp)), 4.03 (d, -OCH<sub>2</sub>-CH<sub>2</sub>-O-), 3.86 (m, -O-CH<sub>3</sub>), 2.31 (m, -Ph-CH<sub>3</sub>), 2.25-0.76 (br, backbone), 0.65-0.06 (m,  $\alpha$ -CH<sub>3</sub>-C-Ar).

**Synthesis of 9-Arm A<sub>3</sub>B<sub>2</sub>C<sub>4</sub>  $\mu$ -Star Polymers.** The title 9-arm A<sub>3</sub>B<sub>2</sub>C<sub>4</sub>  $\mu$ -star polymer was synthesized by the iterative methodology using **4** described in the text. The NMR spectra of all the synthesized polymers were as follows: <sup>1</sup>H NMR, chain-end-(formyl)<sub>2</sub>-functionalized PS: 10.1 (s, -CHO), 7.24–6.36 (br, aromatic), 2.21–0.54 (br, backbone and *sec*-Bu), in-chain-((OH)<sub>2</sub> and (DOL)<sub>4</sub>)-functionalized 3-arm A<sub>3</sub> PSs: 7.23–6.33 (br, aromatic), 5.76 (d, -O-CH(Ar)-O-), 3.96 (d, -OCH<sub>2</sub>-CH<sub>2</sub>-O-), 2.22-0.45 (br, backbone and *sec*-Bu), core-(DOL)<sub>4</sub>-functionalized 5-arm A<sub>3</sub>B<sub>2</sub>  $\mu$ -star polymer: 7.21–6.33 (br, aromatic), 5.74 (d, -O-CH(Ar)-O-), 3.98 (d, -OCH<sub>2</sub>-CH<sub>2</sub>-O-), 3.81–3.53 (m, -COO-CH<sub>3</sub>), 2.23-0.84 (br, backbone and *sec*-Bu), core-(DOL)<sub>4</sub>-functionalized 5-arm A<sub>3</sub>B'<sub>2</sub>  $\mu$ -star polymer: 7.83–6.32 (br, aromatic), 5.75 (d, -O-CH(Ar)-O-), 5.02-4.83 (m, -CH<sub>2</sub>-Ar), 4.04-3.91 (m, -OCH<sub>2</sub>-CH<sub>2</sub>-O-, -COO-CH<sub>2</sub>-CH<sub>2</sub>-), 2.14-0.77 (br, backbone and *sec*-Bu), core-((DOL)<sub>8</sub> and (OH)<sub>4</sub>)-functionalized 9-arm A<sub>3</sub>B<sub>2</sub>C<sub>4</sub>  $\mu$ -star polymer: 7.22–6.01 (br, aromatic), 5.73 (d, -O-CH(Ar)-O-), 4.03 (d, -OCH<sub>2</sub>-CH<sub>2</sub>-O-), 3.85 (m, -O-CH<sub>3</sub>), 2.30 (m, -Ph-CH<sub>3</sub>), 2.25-0.76 (br, backbone), 0.65-0.07 (m,  $\alpha$ -CH<sub>3</sub>-C-Ar).





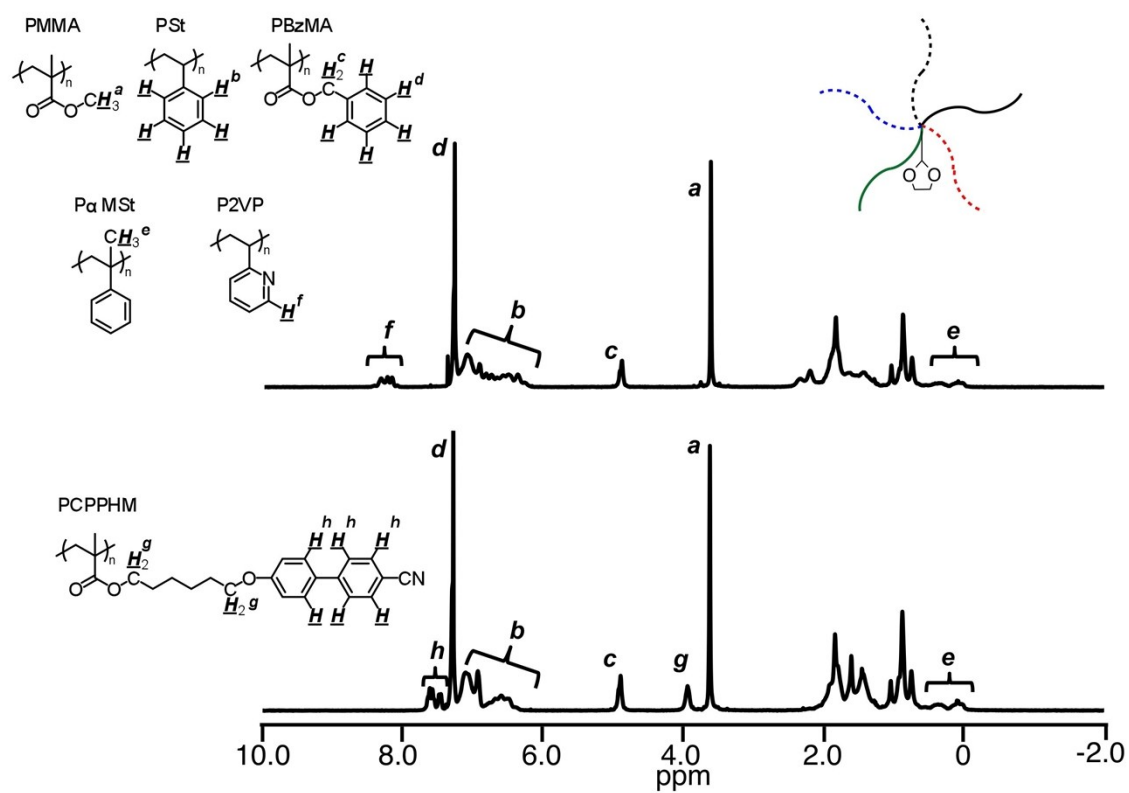

**Fig S1.**  $^1\text{H}$  NMR spectra of the ABCDE and ABCDE'  $\mu$ -star polymers.

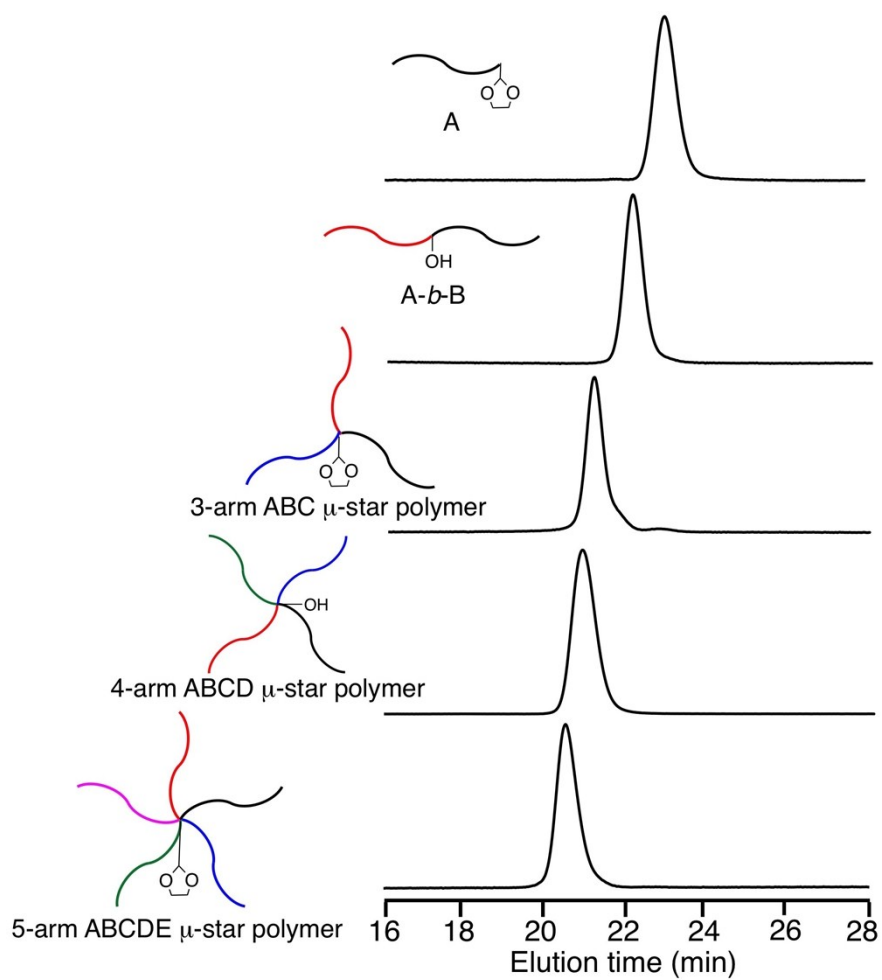

**Fig S2.** SEC profiles from A, AB, 3-arm ABC, 4-arm ABCD, to 5-arm ABCDE  $\mu$ -star polymer composed of all PS derivatives.

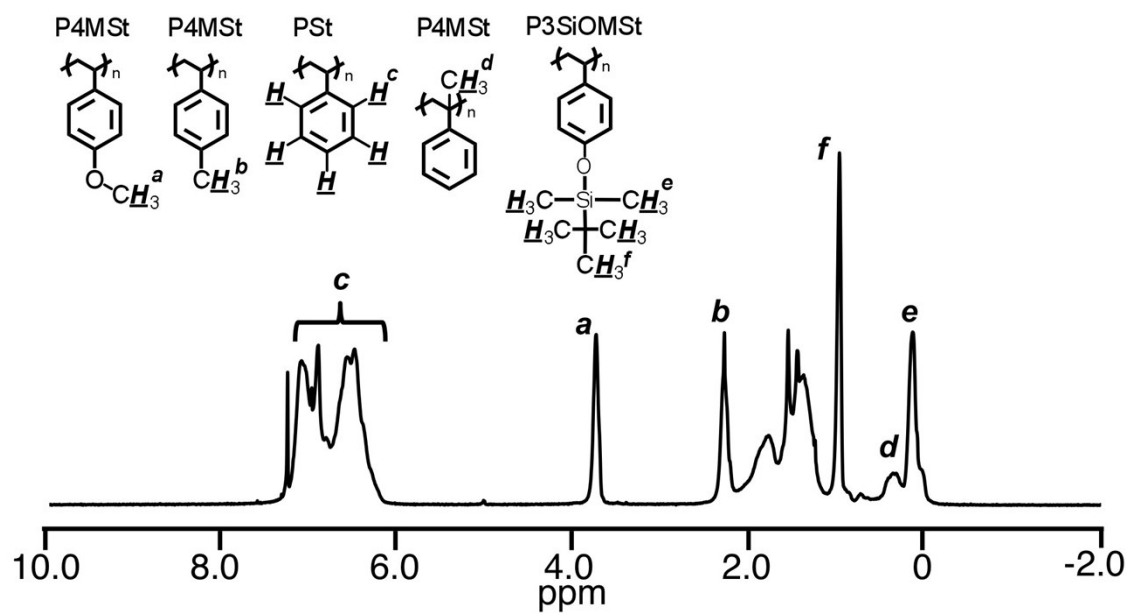

**Fig S3.**  $^1\text{H}$  NMR spectrum of the ABCDE  $\mu$ -star polymer composed of all polystyrene derivatives.

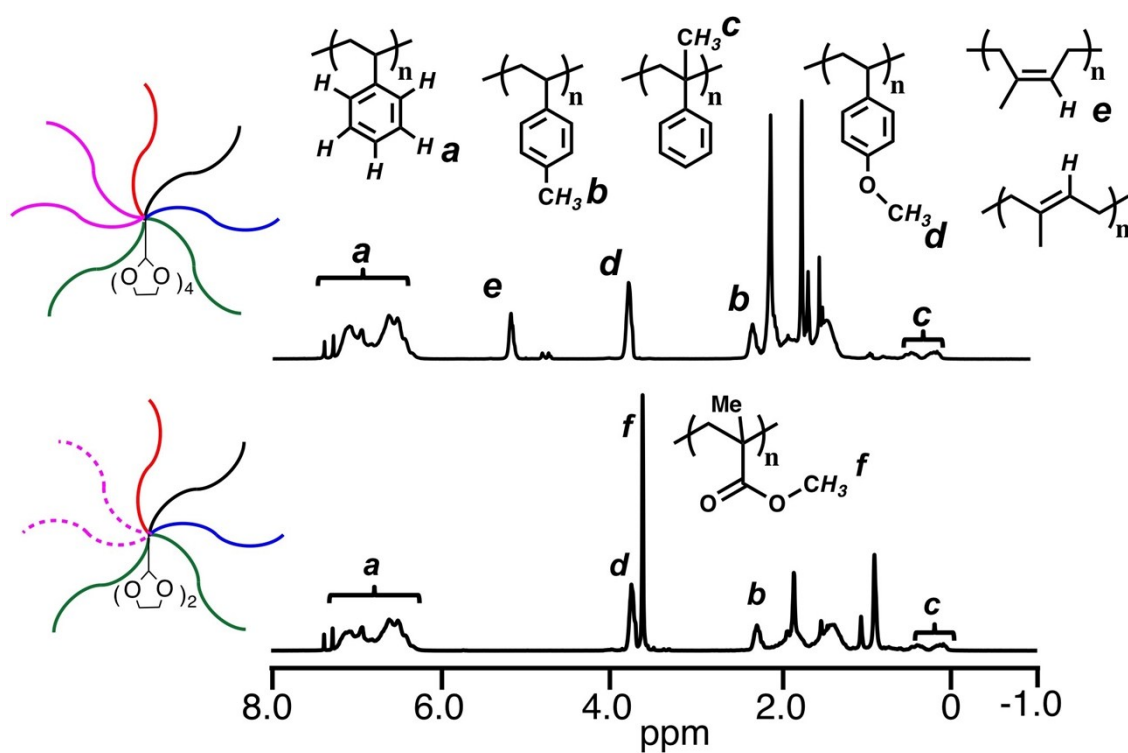

**Fig S4.**  $^1\text{H}$  NMR spectra of the  $\text{ABCD}_2\text{E}_2$  and  $\text{ABCD}_2\text{E}'_2$   $\mu$ -star polymers.

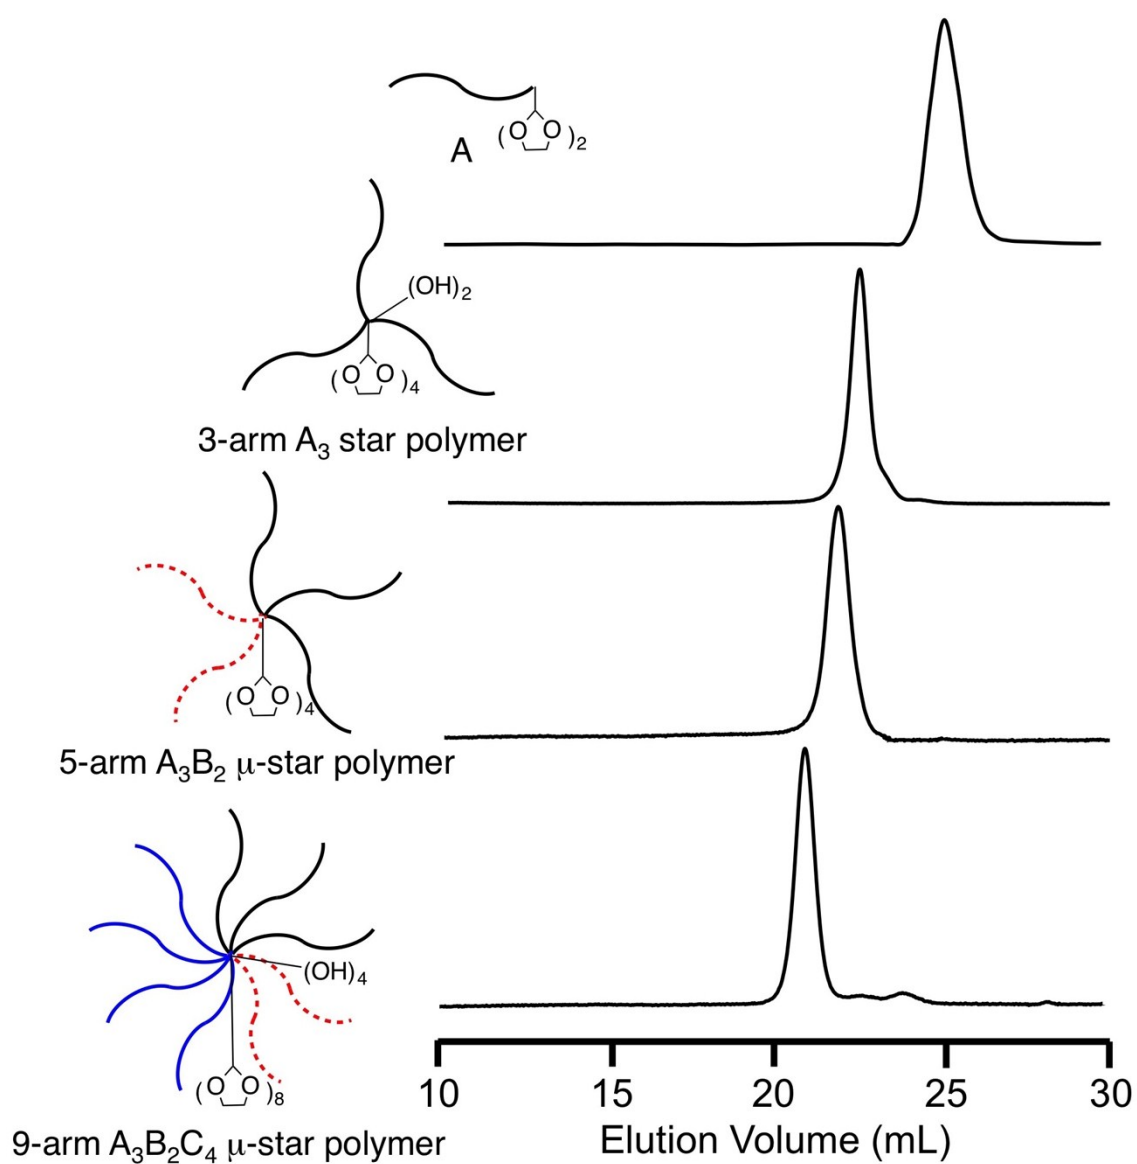

**Fig S5.** SEC profiles from A, 3-arm  $\text{A}_3$ , 5-arm  $\text{A}_3\text{B}_2$ , to 9-arm  $\text{A}_3\text{B}_2\text{C}_4$   $\mu$ -star polymer.

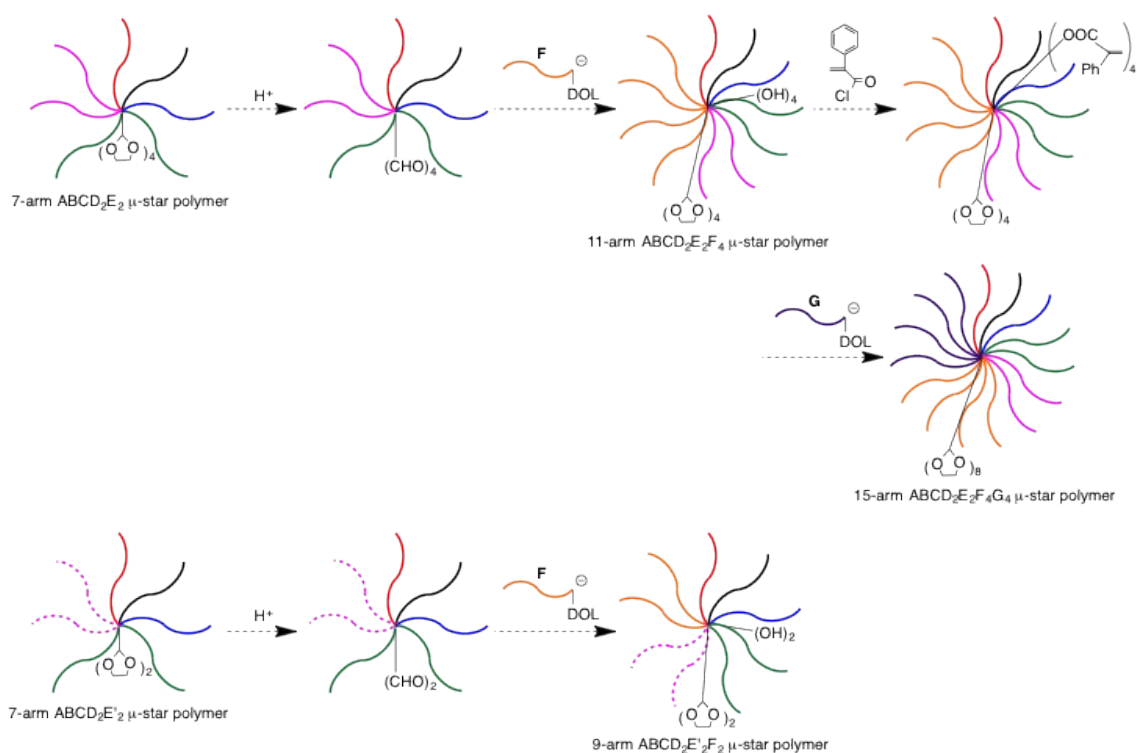

**Scheme S1.** Synthetic possibility of 11-arm and 15-arm μ-star polymers from 7-arm ABCD<sub>2</sub>E<sub>2</sub> (or E'<sub>2</sub>) by iterative methodology using chain-end-DOL-functionalized polymer anions.

## References

1. N. Hadjichristidis, H. Iatrou, S. Pispas, and M. Pitsikalis, *J. Polym. Sci., Part A: Polym. Chem. Ed.*, **2001**, 39, 1403-1418.
2. A. Hirao, A. Matsuo, and T. Watanabe, *Macromolecules*, **2005**, 38, 8701-8711.
3. R. Goseki, Y. Ozama, E. Akemine, S. Ito, S. Ehara, and A. Hirao, *Polymer*, **2013**, 54, 2049-2057.
